# Supplementary material
Source: MDPI journal article supplement (https://www.mdpi.com/1999-4907/13/11/1840)

## Supplementary Files

**Supplementary Table S1.** Statistics of raw data of Miombo soil samples collected from the rhizosphere of *Brachystegia spiciformis* (SBSP) and *Brachystegia boehmii* (SBBP).

| Samples | Total Bases | Read Count | GC (%) | Q20 (%) | Q30 (%) |
|---------|-------------|------------|--------|---------|---------|
| SBBP001 | 99.655.142  | 219.839    | 57.58  | 97.38   | 90.62   |
| SBBP002 | 107.734.810 | 236.512    | 57.64  | 97.25   | 90.25   |
| SBBP003 | 99.443.763  | 218.438    | 57.78  | 97.35   | 90.42   |
| SBBP006 | 99.102.894  | 217.796    | 57.43  | 97.33   | 90.49   |
| SBBP007 | 89.702.471  | 197.247    | 57.16  | 97.53   | 90.83   |
| SBBP008 | 87.016.503  | 191.400    | 57.54  | 97.48   | 90.80   |
| SBBP011 | 95.090.206  | 208.870    | 56.93  | 97.54   | 91.15   |
| SBBP012 | 92.241.797  | 205.388    | 57.56  | 97.57   | 91.10   |
| SBBP013 | 100.966.144 | 222.433    | 57.36  | 97.5    | 90.91   |
| SBBP016 | 89.591.127  | 197.165    | 57.17  | 97.39   | 90.60   |
| SBBP017 | 97.890.593  | 215.237    | 57.54  | 97.52   | 90.93   |
| SBBP018 | 97.160.430  | 213.993    | 57.9   | 97.43   | 90.61   |
| SBSP001 | 91.306.056  | 200.782    | 57.24  | 97.55   | 91.02   |
| SBSP002 | 94.859.771  | 208.460    | 56.95  | 97.45   | 90.76   |
| SBSP003 | 97.966.413  | 215.555    | 57.83  | 97.47   | 90.77   |
| SBSP006 | 103.437.817 | 227.661    | 57.33  | 97.49   | 90.91   |
| SBSP007 | 96.179.736  | 211.279    | 57.68  | 97.36   | 90.56   |
| SBSP008 | 93.502.194  | 206.270    | 57.32  | 97.22   | 90.13   |
| SBSP011 | 100.986.457 | 223.419    | 57.26  | 97.63   | 91.13   |
| SBSP012 | 90.737.076  | 200.357    | 57.19  | 97.39   | 90.65   |
| SBSP013 | 90.806.816  | 200.893    | 55.26  | 97.65   | 91.40   |
| SBSP016 | 90.748.702  | 200.082    | 57.42  | 97.48   | 90.83   |
| SBSP017 | 97.147.660  | 216.018    | 56.96  | 97.61   | 91.33   |
| SBSP018 | 104.186.032 | 229.401    | 57.75  | 97.47   | 90.89   |

**Supplementary Table S2.** ANOVA results showing bacterial differences at the phylum level between the two plant species, the type of soil type and the fire frequency (SS: Sum of Squares; df: degrees of freedom). Significant values are indicated in bold.

| <b>Phylum</b>          | <b>Factor</b>  | <b>df</b> | <b>SS</b> | <b>F value</b> | <b>P</b>      |
|------------------------|----------------|-----------|-----------|----------------|---------------|
| <i>Acidobacteria</i>   | Species        | 1         | 3953628   | 4.16           | 0.0536        |
|                        | Soil Type      | 1         | 6370      | 0.01           | 0.9410        |
|                        | Fire Frequency | 1         | 27540     | 0.02           | 0.8770        |
| <i>Actinobacteria</i>  | Species        | 1         | 4105228   | 1.73           | 0.2020        |
|                        | Soil Type      | 1         | 6692928   | 2.97           | 0.0989        |
|                        | Fire Frequency | 1         | 214326    | 0.08           | 0.7750        |
| <i>Bacteroidetes</i>   | Species        | 1         | 477       | 0.01           | 0.9130        |
|                        | Soil Type      | 1         | 457332    | 25.02          | <b>0.0001</b> |
|                        | Fire Frequency | 1         | 9243      | 0.24           | 0.6300        |
| <i>Chloroflexi</i>     | Species        | 1         | 26600     | 1.04           | 0.3180        |
|                        | Soil Type      | 1         | 158275    | 8.10           | <b>0.0094</b> |
|                        | Fire Frequency | 1         | 72051     | 3.07           | 0.0936        |
| <i>Firmicutes</i>      | Species        | 1         | 196928    | 0.01           | 0.9170        |
|                        | Soil Type      | 1         | 58693793  | 3.91           | <b>0.0307</b> |
|                        | Fire Frequency | 1         | 49749122  | 3.23           | 0.0862        |
| <i>Proteobacteria</i>  | Species        | 1         | 1992384   | 4.85           | <b>0.0384</b> |
|                        | Soil Type      | 1         | 11660     | 0.02           | 0.8800        |
|                        | Fire Frequency | 1         | 1920438   | 4.64           | <b>0.0424</b> |
| <i>Verrucomicrobia</i> | Species        | 1         | 1034180   | 1.24           | 0.2780        |
|                        | Soil Type      | 1         | 94753     | 0.11           | 0.7460        |
|                        | Fire Frequency | 1         | 4072208   | 5.83           | <b>0.0245</b> |

**Supplementary Table S3.** Relative abundance of bacterial classes in the rhizosphere of *Brachystegia spiciformis* and *Brachystegia boehmii* sampled in cambic arenosol and ferric lixisol soils with low and high fire frequencies.

| Phylum          | Class                      | <i>B. spiciformis</i> |          | <i>B. boehmii</i>    |          |                       |          |                      |          | Average       |
|-----------------|----------------------------|-----------------------|----------|----------------------|----------|-----------------------|----------|----------------------|----------|---------------|
|                 |                            | Cambic arenosol soils |          | Ferric lixisol soils |          | Cambic arenosol soils |          | Ferric lixisol soils |          |               |
|                 |                            | High Fire             | Low Fire | High Fire            | Low Fire | High Fire             | Low Fire | High Fire            | Low Fire |               |
| Acidobacteria   | <i>Blastocatellia</i>      | 8.92%                 | 8.37%    | 7.27%                | 3.97%    | 11.23%                | 10.26%   | 6.86%                | 3.54%    | 7.55 ± 0.03%  |
| Acidobacteria   | <i>Vicinamibacteria</i>    | 5.22%                 | 4.13%    | 3.86%                | 2.03%    | 5.01%                 | 4.25%    | 3.61%                | 1.46%    | 3.70 ± 0.16%  |
| Actinobacteria  | <i>Acidimicrobiia</i>      | 3.10%                 | 1.96%    | 2.29%                | 1.43%    | 2.46%                 | 2.25%    | 2.34%                | 1.57%    | 2.18 ± 0.01%  |
| Actinobacteria  | <i>Actinobacteria</i>      | 19.64%                | 18.44%   | 18.13%               | 22.28%   | 16.29%                | 18.94%   | 17.11%               | 18.58%   | 18.68 ± 0.06% |
| Actinobacteria  | <i>Rubrobacteria</i>       | 11.19%                | 11.01%   | 9.27%                | 6.28%    | 9.42%                 | 10.19%   | 7.40%                | 4.52%    | 8.66 ± 0.03%  |
| Actinobacteria  | <i>Thermoleophilia</i>     | 8.77%                 | 6.12%    | 7.13%                | 4.47%    | 6.56%                 | 5.68%    | 6.06%                | 2.39%    | 5.90 ± 0.03%  |
| Bacteroidetes   | <i>Chitinophagia</i>       | 1.92%                 | 1.94%    | 0.89%                | 0.78%    | 2.32%                 | 1.93%    | 1.25%                | 0.63%    | 1.46 ± 0.01%  |
| Bacteroidetes   | <i>Cytophagia</i>          | 0.54%                 | 0.06%    | 0.05%                | 0.03%    | 0.17%                 | 0.09%    | 0.09%                | 0.03%    | 0.13 ± 0.01%  |
| Chloroflexi     | <i>Dehalococcoidia</i>     | 1.76%                 | 1.00%    | 1.62%                | 0.60%    | 1.28%                 | 1.23%    | 1.26%                | 0.40%    | 1.14 ± 0.01%  |
| Firmicutes      | <i>Bacilli</i>             | 1.42%                 | 8.96%    | 12.39%               | 22.93%   | 2.21%                 | 4.53%    | 5.25%                | 25.73%   | 10.43 ± 0.14% |
| Firmicutes      | <i>Clostridia</i>          | 0.82%                 | 0.34%    | 0.44%                | 0.26%    | 0.61%                 | 0.33%    | 0.47%                | 0.25%    | 0.44 ± 0.01%  |
| Nitrospirae     | <i>Nitrospira</i>          | 0.28%                 | 0.17%    | 0.15%                | 0.08%    | 0.51%                 | 0.29%    | 0.14%                | 0.06%    | 0.21 ± 0.01%  |
| Proteobacteria  | <i>Alphaproteobacteria</i> | 11.43%                | 10.42%   | 13.40%               | 9.39%    | 13.85%                | 12.22%   | 17.18%               | 10.48%   | 12.30 ± 0.03% |
| Proteobacteria  | <i>Betaproteobacteria</i>  | 2.55%                 | 2.10%    | 1.91%                | 1.87%    | 2.49%                 | 2.12%    | 2.37%                | 2.39%    | 2.23 ± 0.01%  |
| Proteobacteria  | <i>Deltaproteobacteria</i> | 3.26%                 | 1.73%    | 2.54%                | 1.18%    | 2.13%                 | 1.97%    | 1.81%                | 1.29%    | 1.99 ± 0.01%  |
| Proteobacteria  | <i>Gammaproteobacteria</i> | 1.28%                 | 0.74%    | 0.78%                | 0.28%    | 1.63%                 | 1.10%    | 0.86%                | 0.45%    | 0.89 ± 0.01%  |
| Verrucomicrobia | <i>Verrucomicrobiae</i>    | 1.57%                 | 1.33%    | 1.50%                | 1.18%    | 1.51%                 | 1.24%    | 1.65%                | 1.40%    | 1.42 ± 0.01%  |
| Others          | Others                     | 16.34%                | 21.19%   | 16.36%               | 20.97%   | 20.32%                | 21.39%   | 24.29%               | 24.81%   | 20.71 ± 0.07% |

**Supplementary Table S4.** Relative abundance of the most frequent bacterial genus (>1% across all samples) in the rhizosphere of *Brachystegia spiciformis* and *Brachystegia boehmii* sampled in cambic arenosol and ferric lixisol soils with low and high fire frequencies.

| Phylum          | Genus                    | <i>B. spiciformis</i> |          | <i>B. boehmii</i>    |          | Average               |          |                      |          |              |
|-----------------|--------------------------|-----------------------|----------|----------------------|----------|-----------------------|----------|----------------------|----------|--------------|
|                 |                          | Cambic arenosol soils |          | Ferric lixisol soils |          | Cambic arenosol soils |          | Ferric lixisol soils |          |              |
|                 |                          | High Fire             | Low Fire | High Fire            | Low Fire | High Fire             | Low Fire | High Fire            | Low Fire |              |
| Actinobacteria  | <i>Streptomyces</i>      | 3.25%                 | 6.80%    | 5.90%                | 15.23%   | 5.86%                 | 6.67%    | 4.93%                | 11.92%   | 7.57 ± 0.06% |
| Actinobacteria  | <i>Gaiella</i>           | 8.79%                 | 9.68%    | 8.55%                | 6.02%    | 7.41%                 | 8.21%    | 6.86%                | 4.28%    | 7.48 ± 0.03% |
| Verrucomicrobia | <i>Chthoniobacter</i>    | 3.52%                 | 9.66%    | 5.75%                | 5.33%    | 6.95%                 | 8.83%    | 3.69%                | 9.28%    | 6.63 ± 0.04% |
| Firmicutes      | <i>Bacillus</i>          | 1.08%                 | 8.23%    | 12.28%               | 10.93%   | 2.10%                 | 3.62%    | 3.77%                | 8.74%    | 6.34 ± 0.07% |
| Acidobacteria   | <i>Brevitalea</i>        | 6.68%                 | 6.21%    | 5.63%                | 2.87%    | 8.36%                 | 7.17%    | 5.29%                | 2.52%    | 5.59 ± 0.03% |
| Proteobacteria  | <i>Rhodoplanes</i>       | 4.11%                 | 4.63%    | 6.38%                | 4.05%    | 5.16%                 | 4.98%    | 6.97%                | 4.00%    | 5.04 ± 0.02% |
| Actinobacteria  | <i>Solirubrobacter</i>   | 7.12%                 | 4.03%    | 4.13%                | 2.55%    | 4.92%                 | 4.01%    | 3.35%                | 1.37%    | 3.93 ± 0.02% |
| Firmicutes      | <i>Lactobacillus</i>     | 0.00%                 | 0.64%    | 0.00%                | 11.76%   | 0.00%                 | 0.80%    | 1.23%                | 16.92%   | 3.92 ± 0.12% |
| Acidobacteria   | <i>Vicinamibacter</i>    | 4.70%                 | 3.99%    | 3.65%                | 1.97%    | 4.44%                 | 3.85%    | 3.39%                | 1.40%    | 3.42 ± 0.01% |
| Acidobacteria   | <i>Acidobacterium</i>    | 0.19%                 | 0.71%    | 1.01%                | 6.58%    | 0.59%                 | 1.11%    | 6.83%                | 7.21%    | 3.03 ± 0.05% |
| Actinobacteria  | <i>Aciditerrimonas</i>   | 2.02%                 | 1.47%    | 1.65%                | 1.05%    | 1.61%                 | 1.50%    | 1.44%                | 1.26%    | 1.50 ± 0.01% |
| Verrucomicrobia | <i>Limisphaera</i>       | 1.56%                 | 1.33%    | 1.49%                | 1.17%    | 1.50%                 | 1.24%    | 1.64%                | 1.40%    | 1.42 ± 0.01% |
| Actinobacteria  | <i>Saccharopolyspora</i> | 1.52%                 | 1.51%    | 4.26%                | 0.34%    | 0.15%                 | 1.84%    | 1.52%                | 0.16%    | 1.41 ± 0.03% |
| Proteobacteria  | <i>Bradyrhizobium</i>    | 0.82%                 | 1.17%    | 1.64%                | 1.03%    | 0.98%                 | 1.15%    | 2.49%                | 1.85%    | 1.39 ± 0.01% |
| Acidobacteria   | <i>Paludibaculum</i>     | 0.82%                 | 1.14%    | 1.02%                | 1.48%    | 1.30%                 | 1.24%    | 2.37%                | 1.63%    | 1.38 ± 0.01% |
| Acidobacteria   | <i>Arenimicrobium</i>    | 1.33%                 | 1.23%    | 0.90%                | 0.66%    | 1.86%                 | 2.18%    | 0.90%                | 0.57%    | 1.20 ± 0.01% |
| Actinobacteria  | <i>Rubrobacter</i>       | 2.39%                 | 1.34%    | 0.72%                | 0.26%    | 2.00%                 | 1.98%    | 0.54%                | 0.25%    | 1.18 ± 0.02% |
| Planctomycetes  | <i>Tepidisphaera</i>     | 0.91%                 | 1.10%    | 1.13%                | 1.13%    | 1.22%                 | 1.13%    | 1.63%                | 0.96%    | 1.15 ± 0.01% |
| Chloroflexi     | <i>Dehalogenimonas</i>   | 1.76%                 | 1.00%    | 1.62%                | 0.60%    | 1.28%                 | 1.23%    | 1.26%                | 0.40%    | 1.14 ± 0.01% |
| Actinobacteria  | <i>Micromonospora</i>    | 2.73%                 | 1.15%    | 0.50%                | 0.48%    | 1.23%                 | 1.41%    | 0.77%                | 0.30%    | 1.07 ± 0.01% |

**Supplementary Table S5.** Topological properties of the empirical networks and their 100 corresponding random networks.

| Network Indexes |                                               | High fire frequency  |                 |        | Low fire frequency   |                 |        |
|-----------------|-----------------------------------------------|----------------------|-----------------|--------|----------------------|-----------------|--------|
|                 |                                               | Empirical<br>Network | 100<br>Networks | Random | Empirical<br>Network | 100<br>Networks | Random |
| 1.              | Average clustering coefficient (avgCC)        | 0.167                | 0.027 +/- 0.008 |        | 0.378                | 0.259 +/- 0.016 |        |
| 2.              | Average path distance (GD)                    | 6.042                | 3.927 +/- 0.084 |        | 3.033                | 2.509 +/- 0.027 |        |
| 3.              | Geodesic efficiency (E)                       | 0.241                | 0.294 +/- 0.005 |        | 0.407                | 0.447 +/- 0.003 |        |
| 4.              | Harmonic geodesic distance (HD)               | 4.149                | 3.408 +/- 0.056 |        | 2.456                | 2.239 +/- 0.016 |        |
| 5.              | Centralization of degree (CD)                 | 0.073                | 0.073 +/- 0.000 |        | 0.222                | 0.222 +/- 0.000 |        |
| 6.              | Centralization of betweenness (CB)            | 0.174                | 0.125 +/- 0.021 |        | 0.057                | 0.063 +/- 0.010 |        |
| 7.              | Centralization of stress centrality (CS)      | 0.775                | 0.331 +/- 0.055 |        | 1.383                | 0.404 +/- 0.044 |        |
| 8.              | Centralization of eigenvector centrality (CE) | 0.319                | 0.262 +/- 0.034 |        | 0.172                | 0.156 +/- 0.007 |        |
| 9.              | Density (D)                                   | 0.021                | 0.021 +/- 0.000 |        | 0.07                 | 0.070 +/- 0.000 |        |
| 10.             | Reciprocity                                   | 1                    | 1.000 +/- 0.000 |        | 1                    | 1.000 +/- 0.000 |        |
| 11.             | Transitivity (Trans)                          | 0.249                | 0.046 +/- 0.009 |        | 0.481                | 0.296 +/- 0.007 |        |
| 12.             | Connectedness (Con)                           | 0.559                | 0.879 +/- 0.044 |        | 0.787                | 0.978 +/- 0.019 |        |
| 13.             | Efficiency                                    | 0.972                | 0.983 +/- 0.001 |        | 0.917                | 0.934 +/- 0.001 |        |
| 14.             | Hierarchy                                     | 0                    | 0.000 +/- 0.000 |        | 0                    | 0.000 +/- 0.000 |        |
| 15.             | Lubness                                       | 1                    | 1.000 +/- 0.000 |        | 1                    | 1.000 +/- 0.000 |        |
| 16.             | Modularity (fast_greedy)                      | 0.701                | 0.533 +/- 0.010 |        | 0.312                | 0.186 +/- 0.005 |        |

**Supplementary Table S6.** Top pathways detected by Picrust in samples.

| Pathways                  | Description                                                  | <i>B. spiciformis</i> |          |                      |          | <i>B. boehmii</i>     |          |                      |          |
|---------------------------|--------------------------------------------------------------|-----------------------|----------|----------------------|----------|-----------------------|----------|----------------------|----------|
|                           |                                                              | Cambic arenosol soils |          | Ferric lixisol soils |          | Cambic arenosol soils |          | Ferric lixisol soils |          |
|                           |                                                              | High Fire             | Low Fire | High Fire            | Low Fire | High Fire             | Low Fire | High Fire            | Low Fire |
| PWY-3781                  | aerobic respiration I (cytochrome c)                         | 58602.15              | 64611.06 | 56699.90             | 53909.96 | 59113.76              | 60482.69 | 59567.91             | 60546.25 |
| PWY-7111                  | pyruvate fermentation to isobutanol (engineered)             | 32710.61              | 36439.80 | 33030.12             | 29908.47 | 32758.97              | 34490.05 | 36597.58             | 37522.41 |
| PWY-5101                  | L-isoleucine biosynthesis II                                 | 32555.50              | 35190.35 | 31132.74             | 28234.22 | 32439.40              | 33301.03 | 34087.91             | 33764.92 |
| ILEUSYN-PWY               | L-isoleucine biosynthesis I (from threonine)                 | 31790.04              | 34252.84 | 30601.62             | 27728.31 | 31737.33              | 32579.77 | 33655.77             | 33424.84 |
| VALSYN-PWY                | L-valine biosynthesis                                        | 31790.04              | 34252.84 | 30601.62             | 27728.31 | 31737.33              | 32579.77 | 33655.77             | 33424.84 |
| BRANCHED-CHAIN-AA-SYN-PWY | superpathway of branched amino acid biosynthesis             | 28378.56              | 30661.49 | 26561.04             | 24508.79 | 27993.13              | 28712.49 | 28646.35             | 28234.90 |
| PWY-7094                  | fatty acid salvage                                           | 26958.94              | 28244.93 | 25796.09             | 22907.30 | 25202.69              | 26340.63 | 25911.64             | 23527.52 |
| PWY-5103                  | L-isoleucine biosynthesis III                                | 24845.76              | 27060.88 | 23408.65             | 21481.84 | 24551.31              | 25254.78 | 25246.44             | 24520.10 |
| FAO-PWY                   | fatty acid & beta;-oxidation I                               | 24698.92              | 25695.89 | 22947.81             | 20779.39 | 23066.12              | 23874.31 | 23342.87             | 21062.27 |
| NONOXIPENT-PWY            | pentose phosphate pathway (non-oxidative branch)             | 24206.93              | 28166.22 | 24729.15             | 23730.95 | 23539.17              | 25621.48 | 25428.78             | 35541.26 |
| PWY-5659                  | GDP-mannose biosynthesis                                     | 24185.10              | 25443.23 | 20752.9              | 19683.13 | 23198.65              | 23988.39 | 22224.85             | 23536.73 |
| PWY-6969                  | TCA cycle V (2-oxoglutarate:ferredoxin oxidoreductase)       | 23792.52              | 26465.20 | 22889.71             | 21685.75 | 23499.39              | 24389.29 | 23696.58             | 24556.61 |
| PHOSLIPSYN-PWY            | superpathway of phospholipid biosynthesis I (bacteria)       | 23544.00              | 26394.53 | 22312.38             | 24499.81 | 23465.79              | 24564.79 | 23814.10             | 29312.41 |
| TCA                       | TCA cycle I (prokaryotic)                                    | 23226.82              | 25959.17 | 22286.46             | 21043.14 | 23197.26              | 24040.80 | 23398.31             | 24227.29 |
| PWY-5667                  | CDP-diacylglycerol biosynthesis I                            | 22617.98              | 25542.52 | 22021.82             | 24687.28 | 22553.45              | 23673.38 | 23076.87             | 29538.37 |
| PWY0-1319                 | CDP-diacylglycerol biosynthesis II                           | 22617.98              | 25542.52 | 22021.82             | 24687.28 | 22553.45              | 23673.38 | 23076.87             | 29538.37 |
| PWY-5973                  | cis-vaccenate biosynthesis                                   | 22465.22              | 26724.38 | 23365.76             | 22062.35 | 23982.11              | 25185.5  | 27007.31             | 35597.42 |
| PWY-3001                  | superpathway of L-isoleucine biosynthesis I                  | 22296.69              | 24791.85 | 21428.10             | 20633.58 | 22099.68              | 23012.00 | 22762.92             | 25642.24 |
| PWY4FS-7                  | phosphatidylglycerol biosynthesis I (plastidic)              | 22252.02              | 24998.96 | 21126.66             | 23228.22 | 22212.53              | 23249.64 | 22612.1              | 27893.92 |
| PWY4FS-8                  | phosphatidylglycerol biosynthesis II (non-plastidic)         | 22252.02              | 24998.96 | 21126.66             | 23228.22 | 22212.53              | 23249.64 | 22612.1              | 27893.92 |
| PWY-7229                  | superpathway of adenosine nucleotides de novo biosynthesis I | 22134.79              | 24281.99 | 20826.73             | 22928.53 | 21681.83              | 22537.95 | 22183.68             | 27978.90 |
| P108-PWY                  | pyruvate fermentation to propanoate I                        | 22056.68              | 23320.47 | 20906.46             | 19388.80 | 21097.45              | 21630.76 | 21317.90             | 20454.15 |
| PWY-7208                  | superpathway of pyrimidine nucleobases salvage               | 21965.95              | 24562.50 | 20587.70             | 23142.17 | 21658.05              | 22666.09 | 21838.74             | 28840.44 |

|                 |                                                                 |          |          |          |          |          |          |          |          |
|-----------------|-----------------------------------------------------------------|----------|----------|----------|----------|----------|----------|----------|----------|
| PWY-7219        | adenosine ribonucleotides de novo biosynthesis                  | 21893.84 | 23851.91 | 20165.14 | 22160.19 | 21377.88 | 22230.63 | 21837.58 | 26947.98 |
| PWY-6126        | superpathway of adenosine nucleotides de novo biosynthesis II   | 21343.28 | 23274.7  | 20029.46 | 22050.70 | 20846.94 | 21594.37 | 21354.12 | 26892.63 |
| FASYN-ELONG-PWY | fatty acid elongation -- saturated                              | 21274.89 | 25490.21 | 22585.78 | 21216.20 | 22422.71 | 23783.31 | 25547.81 | 33766.38 |
| PWY-7663        | gondoate biosynthesis (anaerobic)                               | 21274.89 | 25705.11 | 22585.78 | 21233.71 | 22823.29 | 24039.18 | 26288.48 | 37512.10 |
| PWY-5686        | UMP biosynthesis                                                | 21184.50 | 23437.28 | 19922.45 | 21679.00 | 20905.74 | 21828.79 | 21561.96 | 26931.00 |
| PWY0-162        | superpathway of pyrimidine ribonucleotides de novo biosynthesis | 21168.30 | 23147.11 | 19818.04 | 21651.00 | 20749.02 | 21521.31 | 21365.61 | 26708.33 |
| PWY-2942        | L-lysine biosynthesis III                                       | 20985.95 | 23959.73 | 20664.38 | 22889.49 | 20975.74 | 22050.49 | 22113.63 | 30436.84 |

---

**Supplementary Table S7.** Two-way ANOVA of effects of species, soil type and fire frequency on  $\delta^{13}\text{C}$ ,  $\delta^{15}\text{N}$  and CN ratio. SS: Sum of Squares; df: degrees of freedom.

|                       | Factor                   | df | SS      | F value | P                 |
|-----------------------|--------------------------|----|---------|---------|-------------------|
| $\delta^{15}\text{N}$ | Species                  | 1  | 2.824   | 10.220  | <b>0.003</b>      |
|                       | Soil Type                | 1  | 0.443   | 1.272   | 0.268             |
|                       | Fire Frequency           | 1  | 1.258   | 3.886   | 0.057             |
|                       | Fire Frequency*Species   | 1  | 0.797   | 3.453   | 0.073             |
|                       | Fire Frequency*Soil Type | 1  | 0.287   | 0.890   | 0.353             |
|                       | Soil Type*Species        | 1  | 0.012   | 0.043   | 0.838             |
| $\delta^{13}\text{C}$ | Species                  | 1  | 0.073   | 0.123   | 0.728             |
|                       | Soil Type                | 1  | 0.456   | 0.788   | 0.381             |
|                       | Fire Frequency           | 1  | 0.605   | 1.052   | 0.312             |
|                       | Fire Frequency*Species   | 1  | 0.900   | 1.472   | 0.234             |
|                       | Fire Frequency*Soil Type | 1  | 0.400   | 0.619   | 0.437             |
|                       | Soil Type*Species        | 1  | 0.200   | 0.280   | 0.601             |
| C/N                   | Species                  | 1  | 240.400 | 18.230  | <b>&lt; 0.001</b> |
|                       | Soil Type                | 1  | 36.900  | 1.906   | 0.177             |
|                       | Fire Frequency           | 1  | 25.800  | 1.311   | 0.260             |
|                       | Fire Frequency*Species   | 1  | 41.100  | 3.424   | 0.074             |
|                       | Fire Frequency*Soil Type | 1  | 18.000  | 0.941   | 0.340             |
|                       | Soil Type*Species        | 1  | 29.900  | 2.483   | 0.125             |



Supplementary Figures

Supplementary Figure S1. Rarefaction curves of rhizobacteria from *B. spiciformis* (blue) and *B. boehmii* (red).

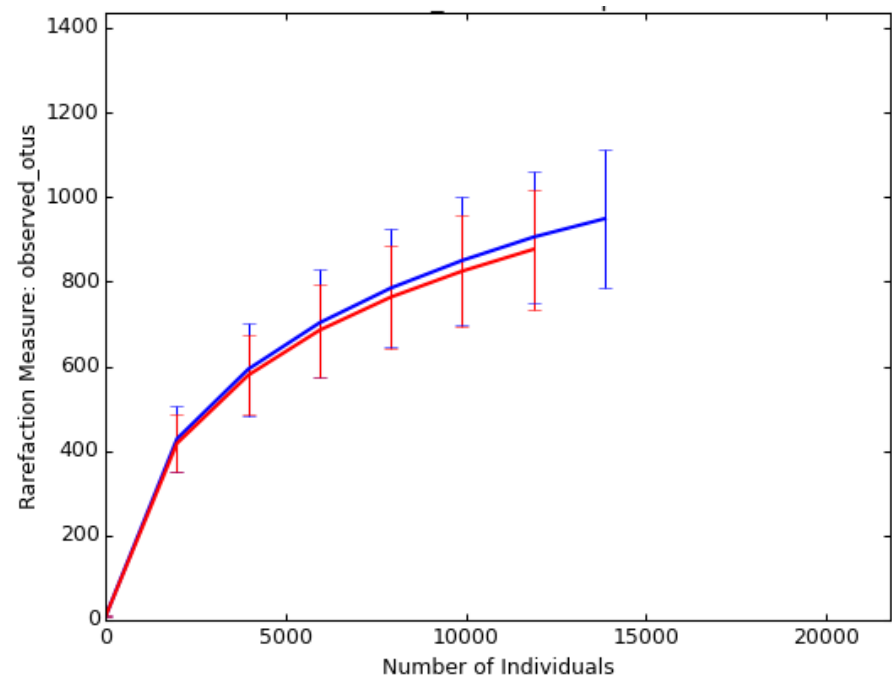

**Supplementary Figure S2.** Principal coordinates analysis of the weighted UniFrac distance matrix. Each point corresponds to a sample and indicates the effect of fire, soil, and species: circles: *B. spiciformis*; *B. boehmii*: squares. LFF in ferric lixisol soils: yellow. HFF in ferric lixisol soils: red. LFF in cambic arenosol soils: light blue. HFF in cambic arenosol soils: dark blue.

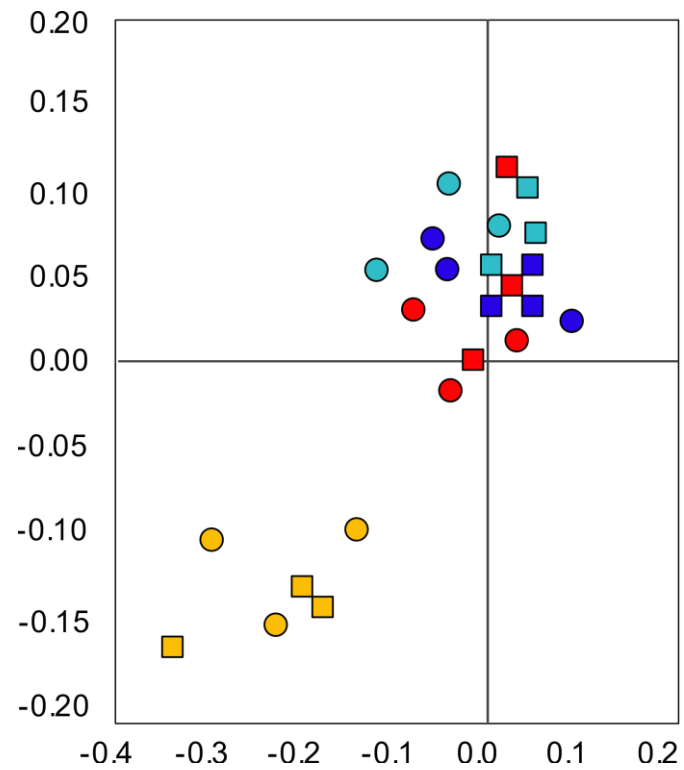

Supplementary Figure S3. Functional categories predicted by Tax4Fun in the rhizosphere of *B. spiciformis* and *B. boehmii*.

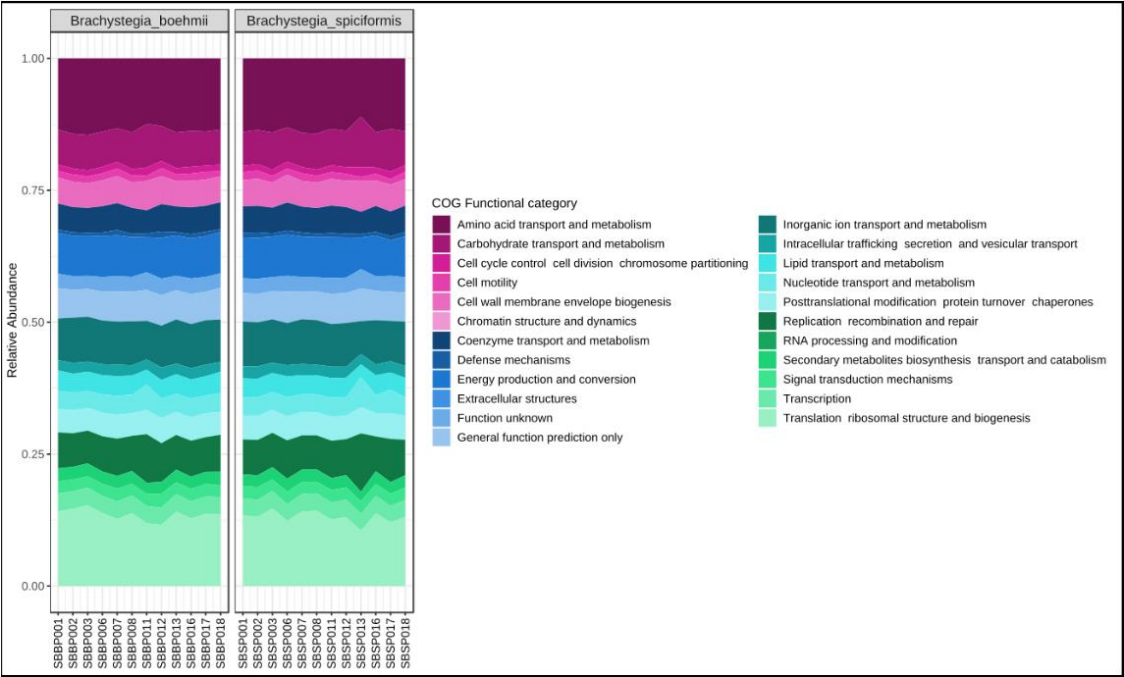

**Supplementary Figure S4.** Scatter plot showing the correlation between the functional profiles across samples of the two groups of species, *Brachystegia spiciformis* (red) and *Brachystegia boehmii* (blue).

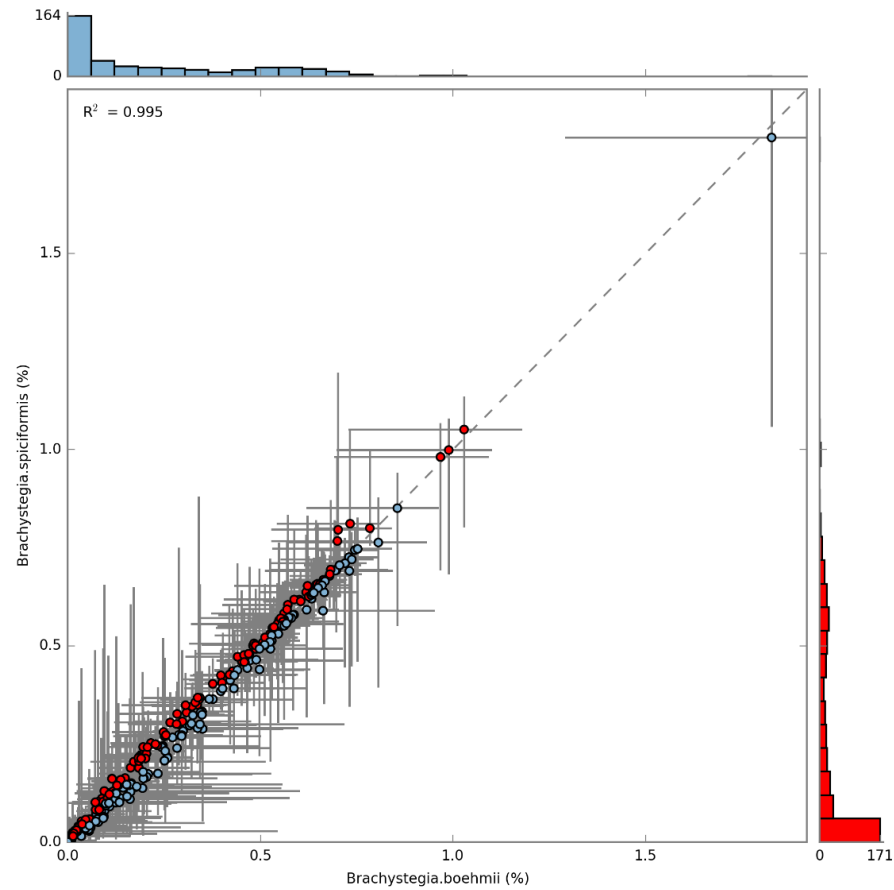

Supplement: s1 [file s1]
